# Supplementary material
Source: PubMed Central journal article supplement (PMC2311356)
Supplement: 0710626105_Supplemental_PDF.pdf [file 0710626105_Supplemental_PDF.pdf]

# Supporting Information

Son *et al.* 10.1073/pnas.0710626105

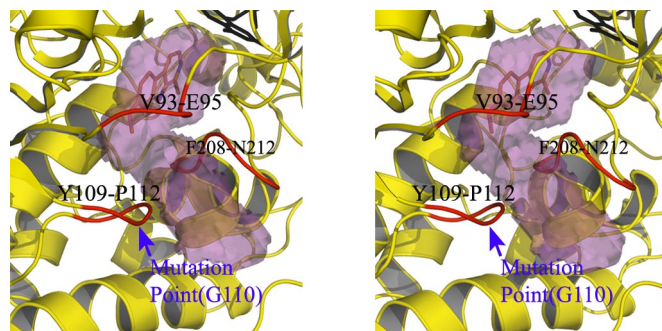

**Fig. S1.** Stereoview of the pathway from the protein surface to the active center. The pathway was by VOIDOO (1) using a probe radius of 1.4 Å. The entrance is surrounded by specific residues: V93-E95 in the K90-L97 loop structure, Y109-P112 (including the mutation point, G110) in the F108-P118 loop structure, and F208-N212 in the F208-R217 loop structure.

1. Kleywegt GJ, Jones TA (1994) Detection, delineation, and display of cavities in macromolecular structures. *Acta Crystallogr D* 50:178–185.
